# Supplementary material
Source: PubMed Central journal article supplement (PMC5797942)
Supplement: ijsem-67-311-s001.pdf [file ijsem-67-311-s001.pdf]

Supplementary material for:

*Rugosibacter aromaticivorans* gen. nov., sp. nov., a novel bacterium within the family *Rhodocyclaceae* isolated from contaminated soil, capable of degrading aromatic compounds  
Elizabeth M. Corteselli, Michael D. Aitken, and David R. Singleton  
*International Journal of Systematic and Evolutionary Microbiology*

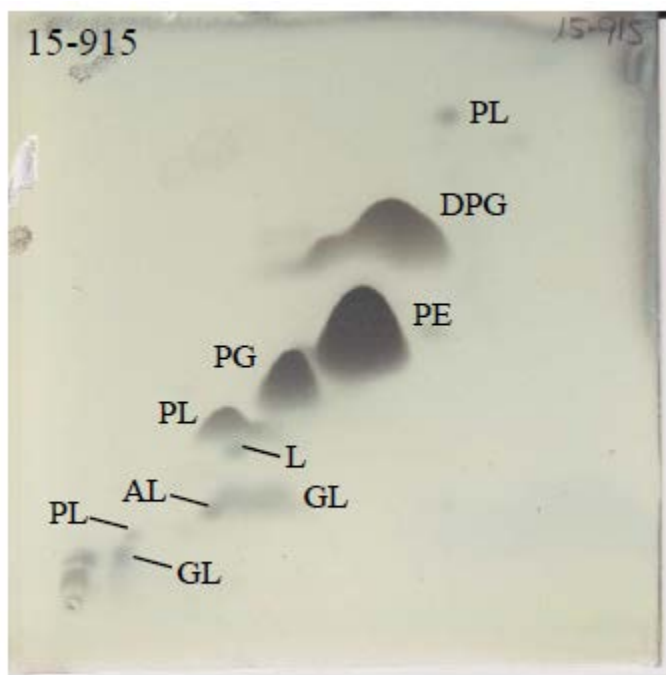

Fig. S1. Polar lipid analyses of strain Ca6<sup>T</sup> as determined by the Identification Service, DSMZ, Braunschweig, Germany. Abbreviations: AL, aminolipid; DPG, diphosphatidylglycerol; GL, glycolipid; L, lipid; PE, phosphatidylethanolamine; PG, phosphatidylglycerol; PL, phospholipid.
